# Supplementary material for: Characteristic gut microbiota and predicted metabolic functions in women with PCOS
Source: PubMed Central journal article supplement — Endocr Connect. 2019 Dec 19;9(1):63–73. doi: 10.1530/EC-19-0522 (PMC6993273; doi:10.1530/ec-19-0522), 2019-12-19
Supplement: supplementary_table_1.pdf [file supplementary_table_1.pdf]

**Table. S1**

Partial correlations between human parameters and gut microbiota at genus level in NG

| <b>Parameters</b>              | <b>Genus in NG</b>                         | <b>r</b>                            | <b>p value</b> |
|--------------------------------|--------------------------------------------|-------------------------------------|----------------|
| LH                             | <i>Ruminococcaceae_UCG-002</i>             | 0.395                               | 0.034          |
| FSH                            | <i>Dialister</i>                           | 0.426                               | 0.021          |
|                                | <i>Veillonella</i>                         | 0.399                               | 0.032          |
| DHEA                           | <i>Roseburia</i>                           | 0.085                               | 0.023          |
|                                | <i>Agathobacter</i>                        | -0.378                              | 0.043          |
| PRL                            | <i>Lachnoclostridium</i>                   | -0.456                              | 0.013          |
| E2                             | <i>Parasutterella</i>                      | 0.466                               | 0.011          |
|                                | <i>Dialister</i>                           | 0.439                               | 0.017          |
| T                              | <i>Prevotella_2</i>                        | 0.410                               | 0.027          |
|                                | <i>Megasphaera</i>                         | 0.381                               | 0.041          |
| FBG                            | <i>Megamonas</i>                           | -0.409                              | 0.028          |
| Insulin_0min                   | <i>Bifidobacterium</i>                     | -0.433                              | 0.019          |
|                                | <i>Collinsella</i>                         | -0.368                              | 0.049          |
| Insulin_60min                  | <i>Lachnospiraceae_unclassified</i>        | -0.609                              | 0.0004         |
|                                | <i>Ruminococcaceae_UCG-002</i>             | 0.475                               | 0.009          |
|                                | <i>Lachnoclostridium</i>                   | -0.473                              | 0.010          |
|                                | <i>Prevotella_2</i>                        | 0.434                               | 0.019          |
|                                | <i>Lachnospiraceae_NK4A136_group</i>       | 0.419                               | 0.024          |
|                                | <i>Coprococcus_2</i>                       | 0.410                               | 0.027          |
|                                | <i>Ruminococcaceae_UCG-005</i>             | 0.407                               | 0.028          |
|                                | <i>Ruminococcus_gnavus_group</i>           | -0.407                              | 0.028          |
|                                | <i>Eubacterium_coprostanoligenes_group</i> | 0.371                               | 0.047          |
|                                | Insulin_90min                              | <i>Lachnospiraceae_unclassified</i> | -0.473         |
| <i>Streptococcus</i>           |                                            | -0.445                              | 0.015          |
| <i>Klebsiella</i>              |                                            | -0.423                              | 0.022          |
| <i>Ruminococcaceae_UCG-014</i> |                                            | 0.406                               | 0.029          |
| <i>Parabacteroides</i>         |                                            | -0.406                              | 0.029          |
| <i>Coprococcus_2</i>           |                                            | 0.403                               | 0.030          |
| <i>Lachnospiraceae_UCG-004</i> |                                            | 0.398                               | 0.032          |
| Insulin_120min                 | <i>Ruminococcaceae_UCG-014</i>             | 0.414                               | 0.026          |
|                                | <i>Lachnospiraceae_unclassified</i>        | -0.408                              | 0.028          |
|                                | <i>Lachnospiraceae_UCG-004</i>             | 0.407                               | 0.028          |
|                                | <i>Coprococcus_2</i>                       | 0.398                               | 0.033          |
| Insulin_180min                 | <i>Klebsiella</i>                          | -0.509                              | 0.005          |
|                                | <i>Lachnospiraceae_unclassified</i>        | -0.508                              | 0.005          |
|                                | <i>Lachnospiraceae_uncultured</i>          | -0.444                              | 0.016          |
|                                | <i>Bifidobacterium</i>                     | -0.373                              | 0.046          |

r, the correlation coefficient used to measure the linear relationship between two variable.
