# Supplementary material for: Characteristic gut microbiota and predicted metabolic functions in women with PCOS
Source: PubMed Central journal article supplement — Endocr Connect. 2019 Dec 19;9(1):63–73. doi: 10.1530/EC-19-0522 (PMC6993273; doi:10.1530/ec-19-0522), 2019-12-19
Supplement: supplementary_table_2.pdf [file supplementary_table_2.pdf]

**Table. S2**

Partial correlations between human parameters and gut microbiota at genus level in OG

| <b>Parameters</b> | <b>Genus in OG</b>                | <b>r</b> | <b>p value</b> |
|-------------------|-----------------------------------|----------|----------------|
| LH                | <i>Dialister</i>                  | -0.407   | 0.025          |
|                   | <i>Romboutsia</i>                 | -0.385   | 0.036          |
| FSH               | <i>Ruminococcaceae_UCG-014</i>    | 0.470    | 0.009          |
| DHEA              | <i>Ruminococcus_torques_group</i> | 0.553    | 0.002          |
|                   | <i>Sutterella</i>                 | -0.370   | 0.044          |
| PRL               | <i>Lachnospirillum</i>            | 0.587    | 0.001          |
|                   | <i>Ruminococcaceae_UCG-014</i>    | -0.434   | 0.017          |
|                   | <i>Ruminococcus_gnavus_group</i>  | 0.366    | 0.047          |
| E2                | <i>Escherichia-Shigella</i>       | -0.530   | 0.003          |
|                   | <i>Subdoligranulum</i>            | 0.512    | 0.004          |
|                   | <i>Collinsella</i>                | 0.436    | 0.016          |
|                   | <i>Ruminococcus_gnavus_group</i>  | -0.428   | 0.018          |
|                   | <i>Sutterella</i>                 | 0.398    | 0.030          |
|                   | <i>Agathobacter</i>               | 0.392    | 0.032          |
| T                 | <i>Ruminococcus_2</i>             | 0.529    | 0.003          |
|                   | <i>Collinsella</i>                | 0.371    | 0.043          |
| FBG               | <i>Haemophilus</i>                | -0.393   | 0.032          |
|                   | <i>Megasphaera</i>                | -0.382   | 0.037          |
| Insulin_0min      | <i>Streptococcus</i>              | -0.521   | 0.003          |
|                   | <i>Roseburia</i>                  | -0.475   | 0.008          |
|                   | <i>Paraprevotella</i>             | 0.366    | 0.047          |
|                   | <i>Agathobacter</i>               | -0.362   | 0.049          |
| Insulin_30min     | <i>Lachnospiraceae_UCG-004</i>    | -0.440   | 0.015          |
|                   | <i>Streptococcus</i>              | -0.437   | 0.016          |
| Insulin_60min     | <i>Faecalibacterium</i>           | -0.467   | 0.010          |
|                   | <i>Dorea</i>                      | 0.394    | 0.031          |
| Insulin_90min     | <i>Lachnospiraceae_UCG-004</i>    | -0.551   | 0.002          |
| Insulin_180min    | <i>Butyricicoccus</i>             | -0.451   | 0.012          |

r, the correlation coefficient used to measure the linear relationship between two variables.
