# Supplementary material for: Characteristic gut microbiota and predicted metabolic functions in women with PCOS
Source: PubMed Central journal article supplement — Endocr Connect. 2019 Dec 19;9(1):63–73. doi: 10.1530/EC-19-0522 (PMC6993273; doi:10.1530/ec-19-0522), 2019-12-19
Supplement: supplementary_table_3.pdf [file supplementary_table_3.pdf]

**Table S3.**

Comparison of predicted microbial function with Kruskal-Wallis H test among groups based on KEGG level-3

---

| <b>KEGG pathway</b>                                        | <b>p value</b> |
|------------------------------------------------------------|----------------|
| Caprolactam degradation                                    | 0.020          |
| Geraniol degradation                                       | 0.026          |
| Ethylbenzene degradation                                   | 0.033          |
| Antigen processing and presentation                        | 0.034          |
| Progesterone-mediated oocyte maturation                    | 0.034          |
| Prostate cancer                                            | 0.045          |
| Type II diabetes mellitus                                  | 0.010          |
| NOD-like receptor signaling pathway                        | 0.047          |
| Alzheimer's disease                                        | 0.021          |
| Ribosome biogenesis in eukaryotes                          | 0.031          |
| Pathways in cancer                                         | 0.018          |
| Primary immunodeficiency                                   | 0.016          |
| Zeatin biosynthesis                                        | 0.006          |
| Isoquinoline alkaloid biosynthesis                         | <0.001         |
| Protein processing in endoplasmic reticulum                | 0.003          |
| Biosynthesis of vancomycin group antibiotics               | 0.038          |
| Toluene degradation                                        | 0.022          |
| Vibrio cholerae pathogenic cycle                           | 0.002          |
| Aminobenzoate degradation                                  | 0.001          |
| Cell division                                              | 0.030          |
| Ascorbate and aldarate metabolism                          | 0.030          |
| Taurine and hypotaurine metabolism                         | 0.038          |
| Lysine degradation                                         | 0.044          |
| Epithelial cell signaling in Helicobacter pylori infection | 0.041          |
| D-Alanine metabolism                                       | 0.018          |
| Tropane, piperidine and pyridine alkaloid biosynthesis     | 0.009          |
| Metabolism of cofactors and vitamins                       | 0.013          |
| Novobiocin biosynthesis                                    | 0.044          |
| Glycosphingolipid biosynthesis - globo series              | 0.033          |
| Peroxisome                                                 | 0.047          |
| Ubiquinone and other terpenoid-quinone biosynthesis        | 0.014          |
| Phenylalanine metabolism                                   | 0.045          |
| D-Glutamine and D-glutamate metabolism                     | 0.025          |
| RNA polymerase                                             | 0.022          |
| Cell motility and secretion                                | 0.002          |
| Valine, leucine and isoleucine degradation                 | 0.003          |
| beta-Alanine metabolism                                    | 0.013          |
| Glutathione metabolism                                     | 0.001          |
| Vitamin B6 metabolism                                      | 0.008          |
| Lipopolysaccharide biosynthesis                            | 0.030          |

---

---

|                                                 |        |
|-------------------------------------------------|--------|
| Riboflavin metabolism                           | 0.004  |
| Prenyltransferases                              | 0.001  |
| Pores ion channels                              | 0.003  |
| Lipopolysaccharide biosynthesis proteins        | 0.003  |
| Drug metabolism - other enzymes                 | 0.008  |
| Glycosyltransferases                            | 0.003  |
| Folate biosynthesis                             | 0.001  |
| Nucleotide excision repair                      | 0.020  |
| Base excision repair                            | 0.050  |
| Nicotinate and nicotinamide metabolism          | 0.048  |
| RNA degradation                                 | 0.028  |
| Citrate cycle (TCA cycle)                       | <0.001 |
| Membrane and intracellular structural molecules | 0.004  |
| Bacterial secretion system                      | 0.029  |
| Cell cycle - Caulobacter                        | 0.013  |
| Translation factors                             | 0.018  |
| Terpenoid backbone biosynthesis                 | 0.011  |
| Protein export                                  | 0.027  |
| Protein folding and associated processing       | 0.015  |
| Carbon fixation in photosynthetic organisms     | 0.024  |
| One carbon pool by folate                       | 0.005  |
| DNA replication                                 | 0.009  |
| Glycine, serine and threonine metabolism        | 0.039  |
| Energy metabolism                               | 0.033  |
| Peptidoglycan biosynthesis                      | 0.047  |
| Mismatch repair                                 | 0.013  |
| Carbon fixation pathways in prokaryotes         | 0.003  |
| Translation proteins                            | 0.037  |
| Homologous recombination                        | 0.014  |
| Cysteine and methionine metabolism              | 0.040  |
| Chaperones and folding catalysts                | 0.015  |
| Oxidative phosphorylation                       | 0.018  |
| DNA replication proteins                        | 0.015  |
| Other ion-coupled transporters                  | 0.030  |
| Amino acid related enzymes                      | 0.036  |
| Chromosome                                      | 0.027  |
| Pyrimidine metabolism                           | 0.012  |
| Peptidases                                      | 0.034  |
| Purine metabolism                               | 0.016  |
| Ribosome                                        | 0.017  |
| DNA repair and recombination proteins           | 0.023  |
| General function prediction only                | 0.046  |

---

KEGG: Kyoto Encyclopedia of Genes and Genomes
