# Supplementary figures and images for: Characteristic gut microbiota and predicted metabolic functions in women with PCOS
Source: PubMed Central journal article supplement — Endocr Connect. 2019 Dec 19;9(1):63–73. doi: 10.1530/EC-19-0522 (PMC6993273; doi:10.1530/ec-19-0522), 2019-12-19

**A**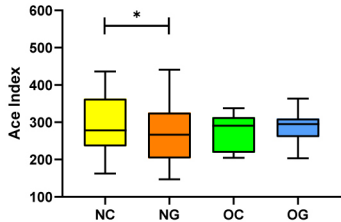**B**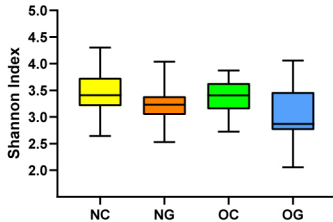**C**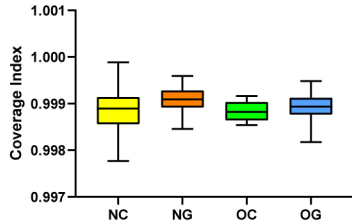

Supplement: supplementary_figure_1.pdf [file supplementary_figure_1.pdf]
